# Supplementary material
Source: publisher figshare collection journal article supplement (https://tandf.figshare.com/articles/dataset/_/8088293)

TMRM levels normalised to DMSO  
(Fold-Change)

3  
2  
1  
0

■ DMSO  
■ 1  $\mu$ M CCCP  
■ 10  $\mu$ M CCCP

None

25 mM Glucose

10% FBS

1 mM Sodium Pyruvate

HBSS Supplementation

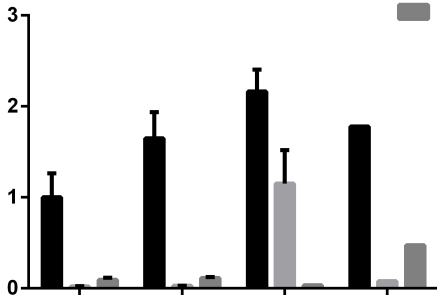

Supplement: Supplementary file 1 [file 2]
