# Supplementary material
Source: publisher figshare collection journal article supplement (https://tandf.figshare.com/articles/dataset/_/8088293)
Supplement: Supplementary file 5 [file 2]

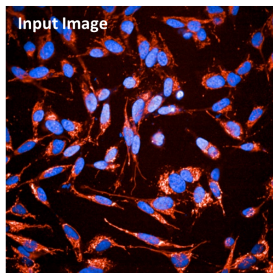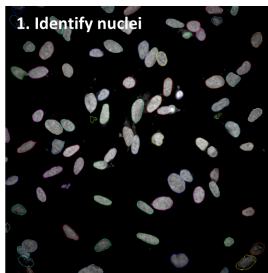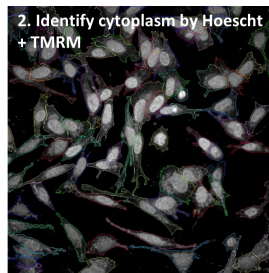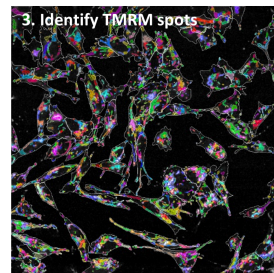

4. Columbus™ software is then used to measure the corrected mean spot intensity multiplied by the mean total spot area per cell to give an integrated intensity reading indicating TMRM load per cell.
