# Supplementary material
Source: publisher figshare collection journal article supplement (https://tandf.figshare.com/articles/dataset/_/8088293)

TMRM levels normalised to DMSO  
(Fold-Change)

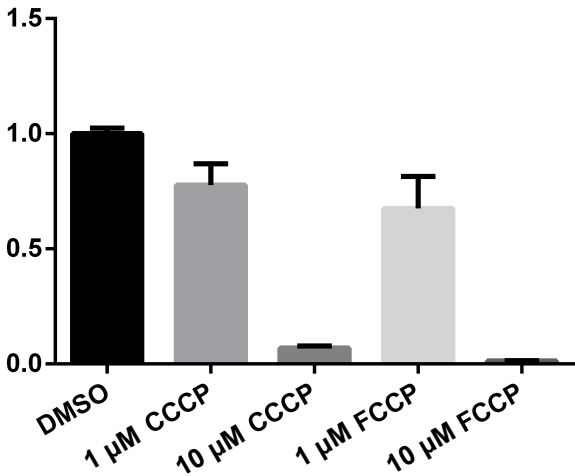

Supplement: Supplementary file 2 [file 2]

A

TMRM levels normalised to DMSO  
with 10% FBS (Fold-Change)

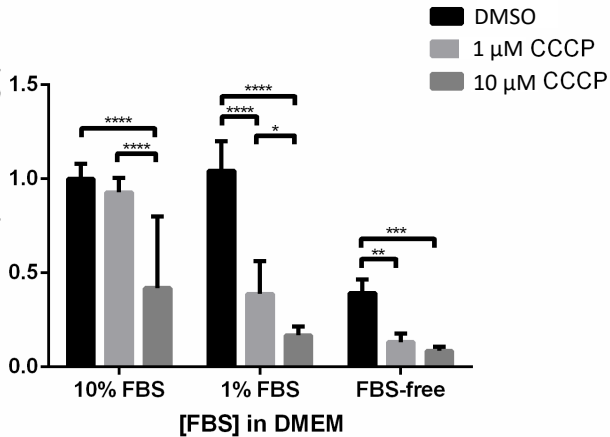

B

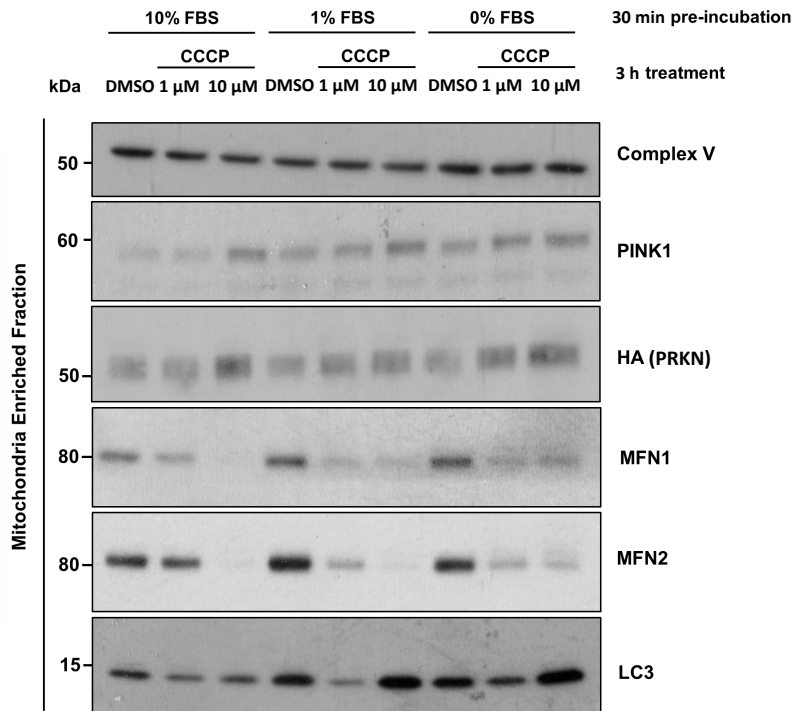

Supplement: Supplementary file 3 [file 2]

TMRM levels normalised to DMSO  
Phenol-Free Media (Fold-Change)

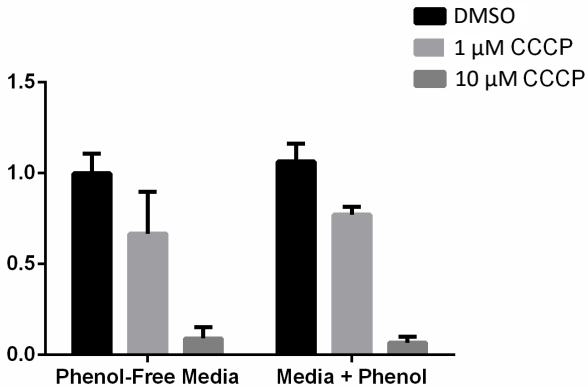

Supplement: Supplementary file 4 [file 2]

A

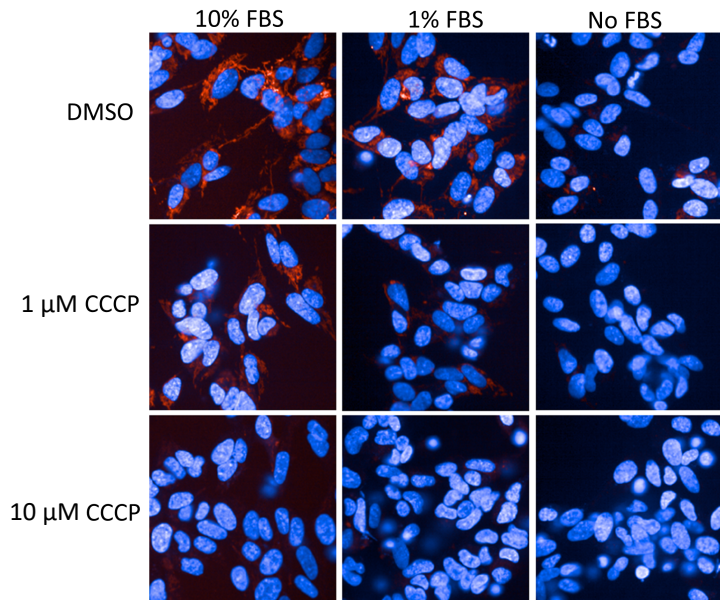

B

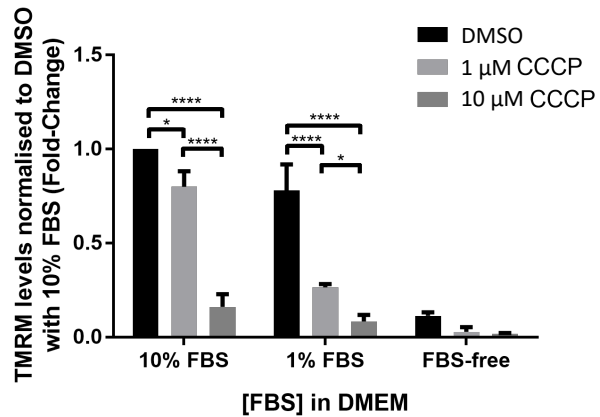

Supplement: Supplementary file 6 [file 2]

A

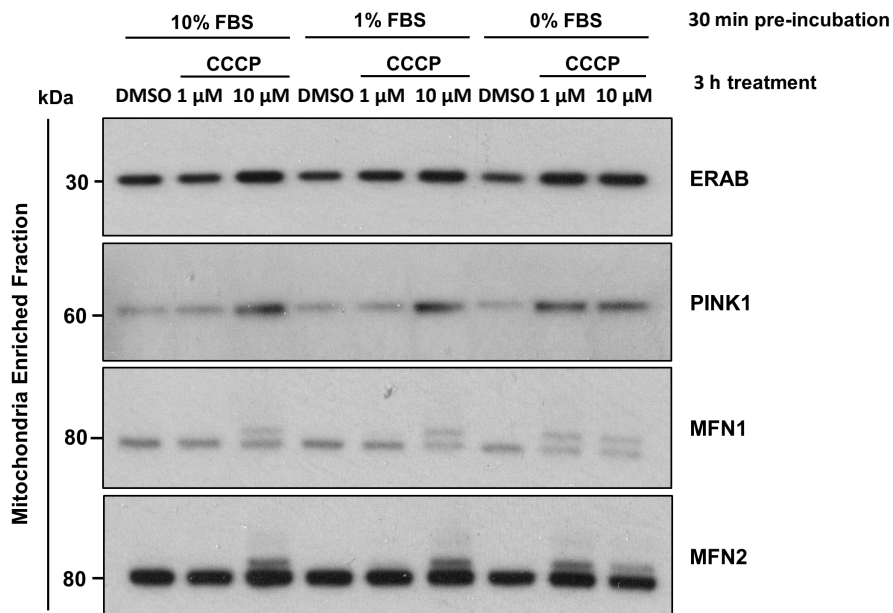

B

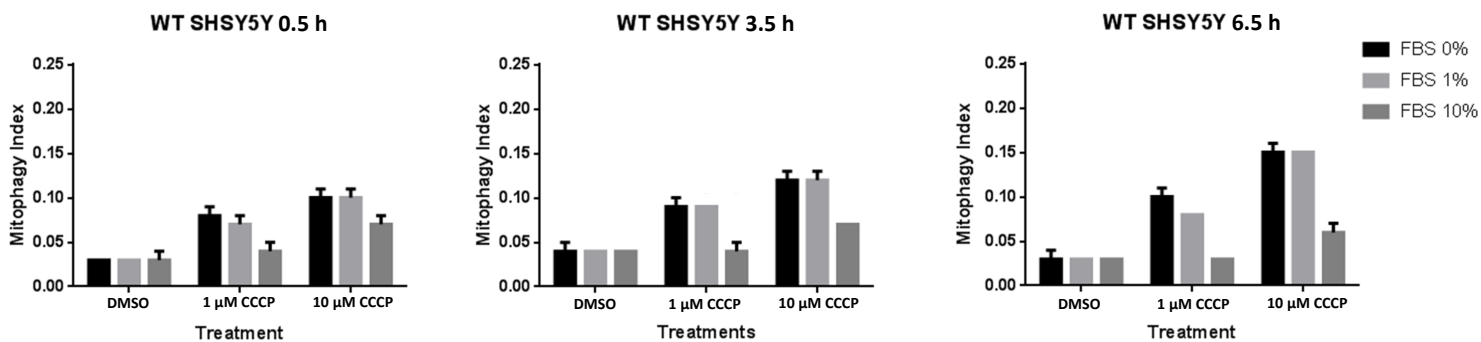

Supplement: Supplementary file 7 [file 2]

A

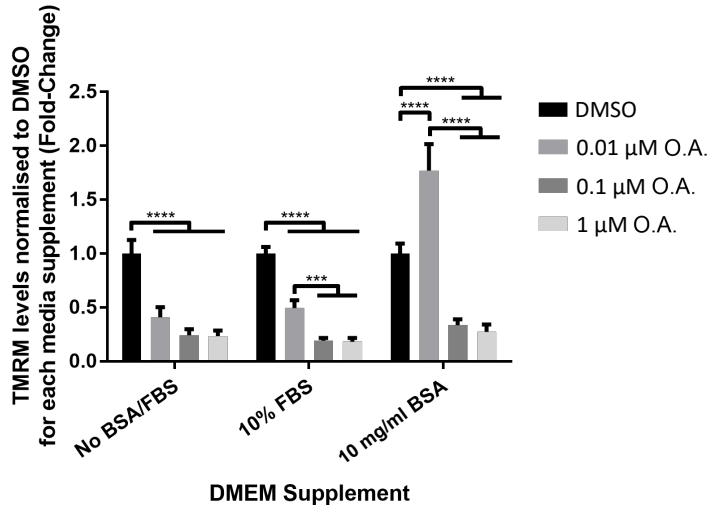

B

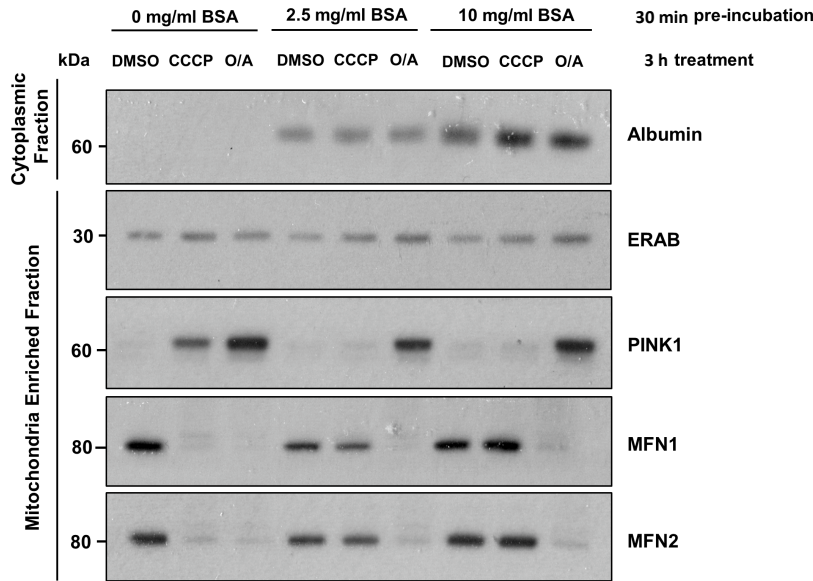

Supplement: Supplementary file 8 [file 2]
